# Supplementary material for: In situ monitoring of cellulose etherification in solution: probing the impact of solvent composition on the synthesis of 3-allyloxy-2-hydroxypropyl-cellulose in aqueous hydroxide systems
Source: Royal Society of Chemistry journal article supplement (doi:10.1039/d2py00231k), 2022-01-01
Supplement: d2py00231k1.pdf [file d2py00231k1.pdf]

## Supporting information

### ***In-situ* monitoring of cellulose etherification in solution: probing the impact of solvent composition on the synthesis of 3-allyloxy-2-hydroxypropyl-cellulose in aqueous hydroxide systems**

Shirin Naserifar<sup>a,b</sup>, Petrus F. Kuijpers<sup>c</sup>, Sylwia Wojno<sup>b,d</sup>, Roland Kádár<sup>b,d</sup>,  
Diana Bernin<sup>a</sup> and Merima Hasani<sup>a,b</sup>

<sup>a</sup>Department of Chemistry and Chemical Engineering, Chalmers University of Technology, 412 96 Gothenburg, Sweden

<sup>b</sup>Wallenberg Wood Science Center, Chalmers University of technology, 412 96 Gothenburg, Sweden

<sup>c</sup>Mettler-Toledo B.V. Franklinstraat 5, 4004 JK Tiel, The Netherlands

<sup>d</sup>Department of Industrial and Materials Science, Chalmers University of Technology,  
412 96 Gothenburg, Sweden

\*Corresponding author: shirin.naserifar@chalmers.se

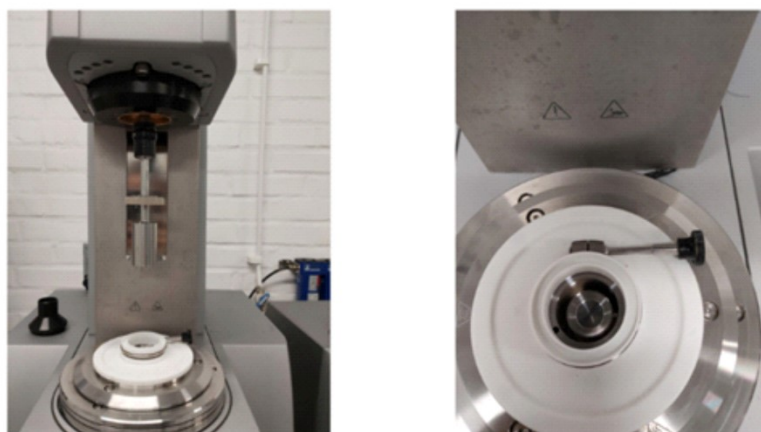

Figure 1. Anton Paar MCR 702 Twin Drive rheometer

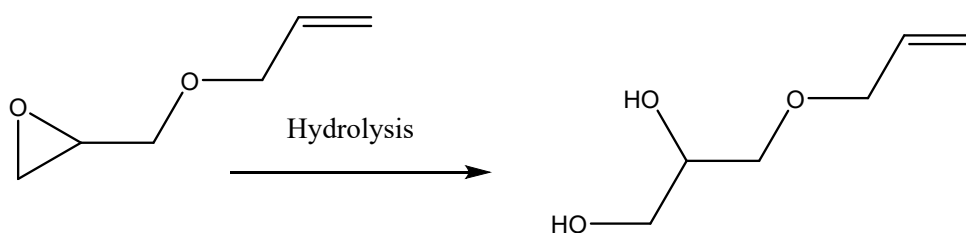

Figure 2. AGE hydrolysis

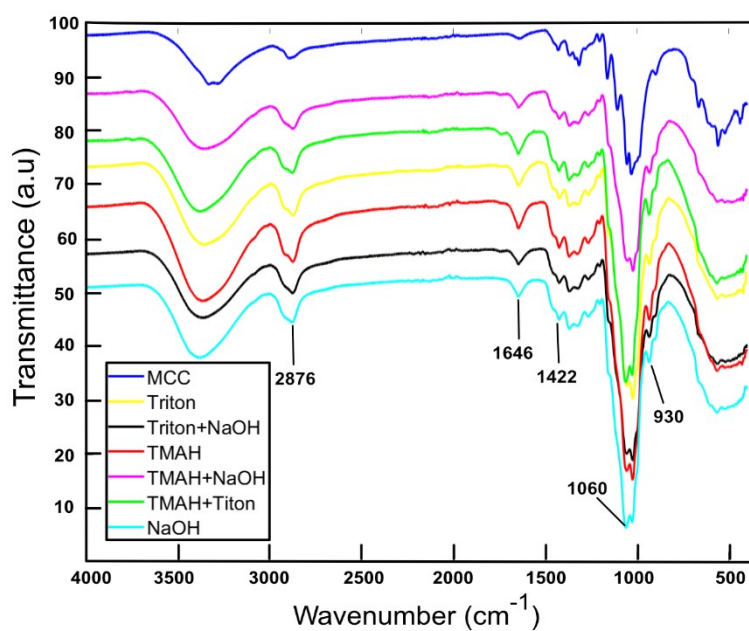

**Figure 3. ATR-FTIR spectra of AHP-cellulose isolated from different solvents**

ATR-FTIR ( $\text{cm}^{-1}$ ): 3358 (OH), 3077 (=CH), 2921 (asymmetric  $\text{CH}_2$ ), 2876 (symmetric  $\text{CH}_2$ ), 1646 (C=C), 1422 ( $\text{CH}_2$ ), 1367 (OH), 1060 (C-O), 930 (=CH)

### NMR spectra

**\*For detailed peak assignments the reader is referred to the main text in the paper.**

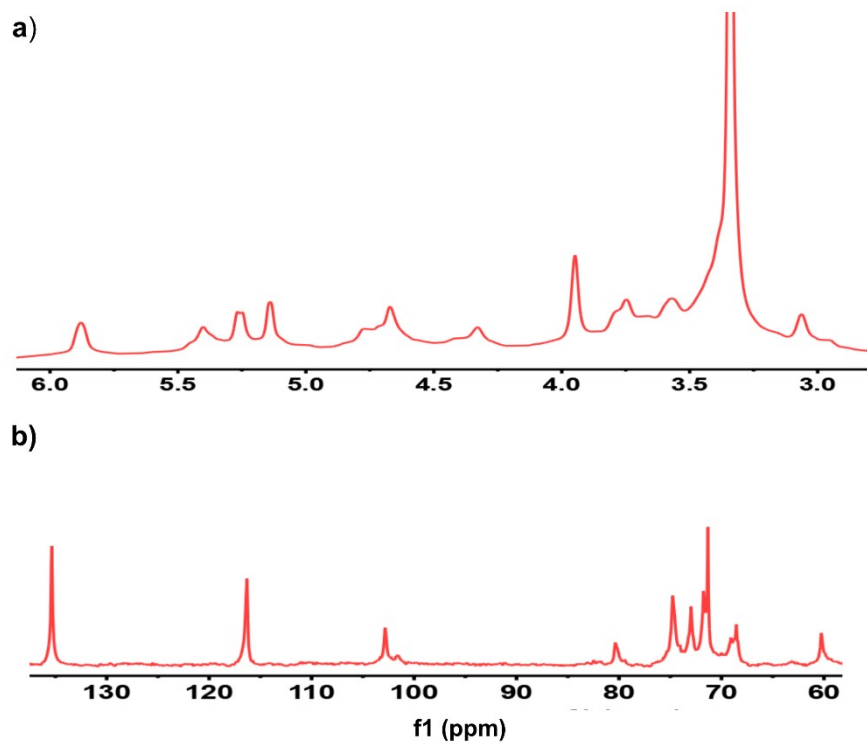

Figure 4. a)  $^1\text{H}$  NMR b)  $^{13}\text{C}$  NMR of AHP-cellulose isolated from NaOH

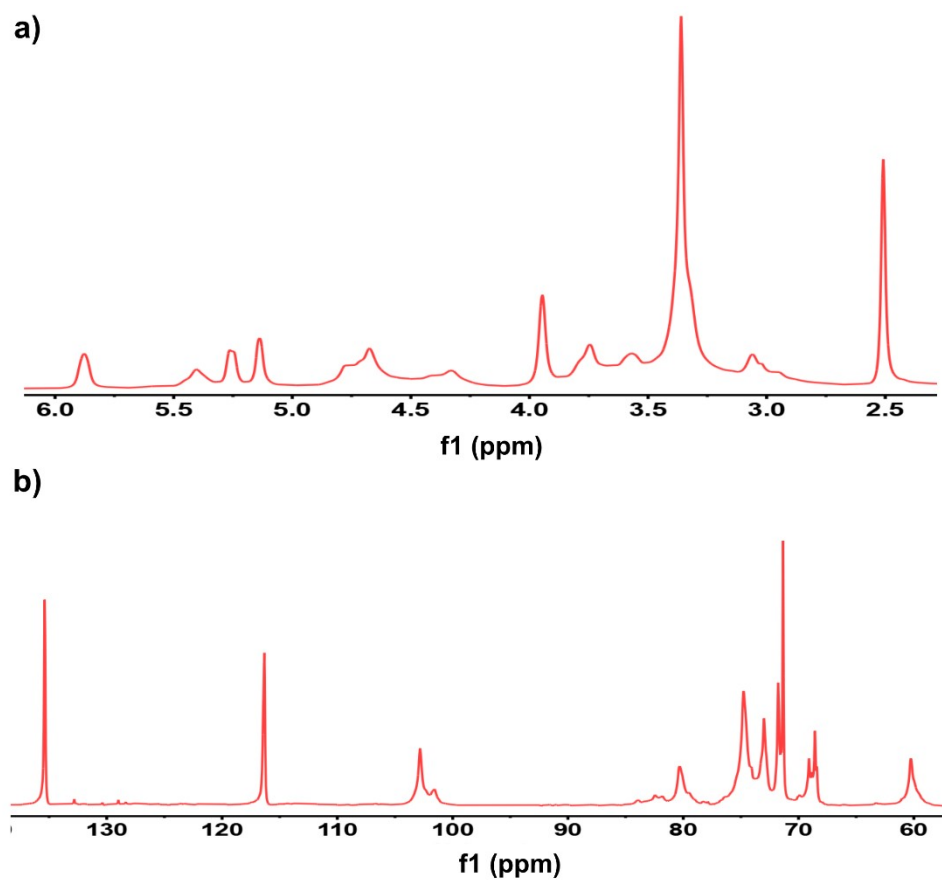

Figure 5. a)  $^1\text{H}$  NMR b)  $^{13}\text{C}$  NMR of AHP-cellulose isolated from NaOH/Triton B

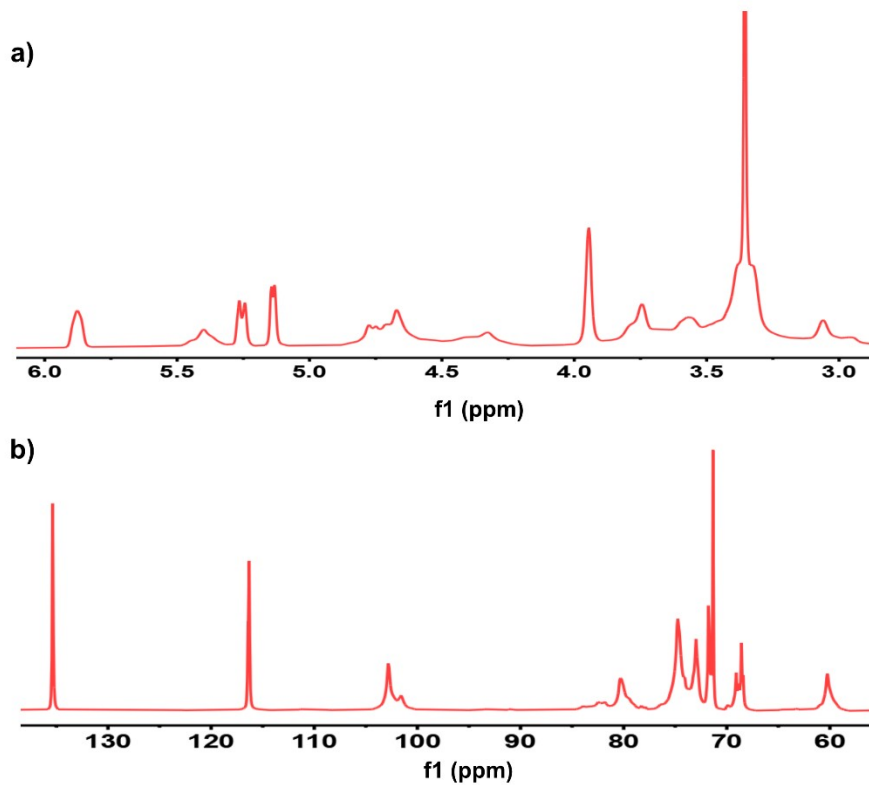

Figure 6. a)  $^1\text{H}$  NMR b)  $^{13}\text{C}$  NMR of AHP-cellulose isolated from NaOH/TMAH

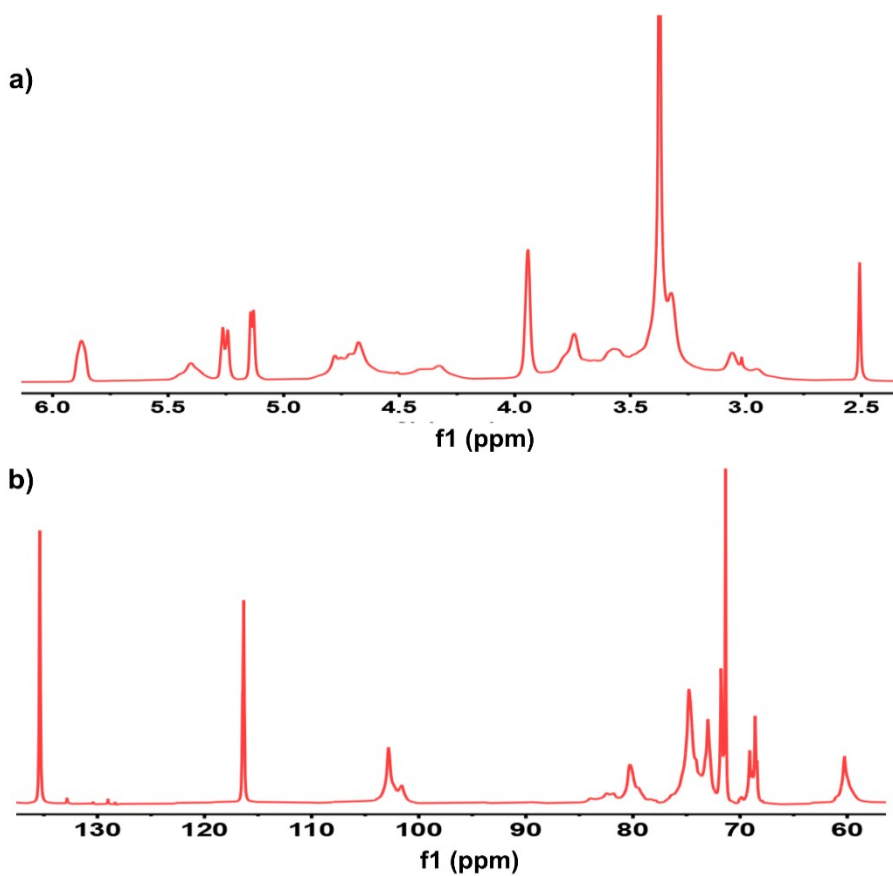

Figure 7. a)  $^1\text{H}$  NMR b)  $^{13}\text{C}$  NMR of AHP-cellulose isolated from Triton B

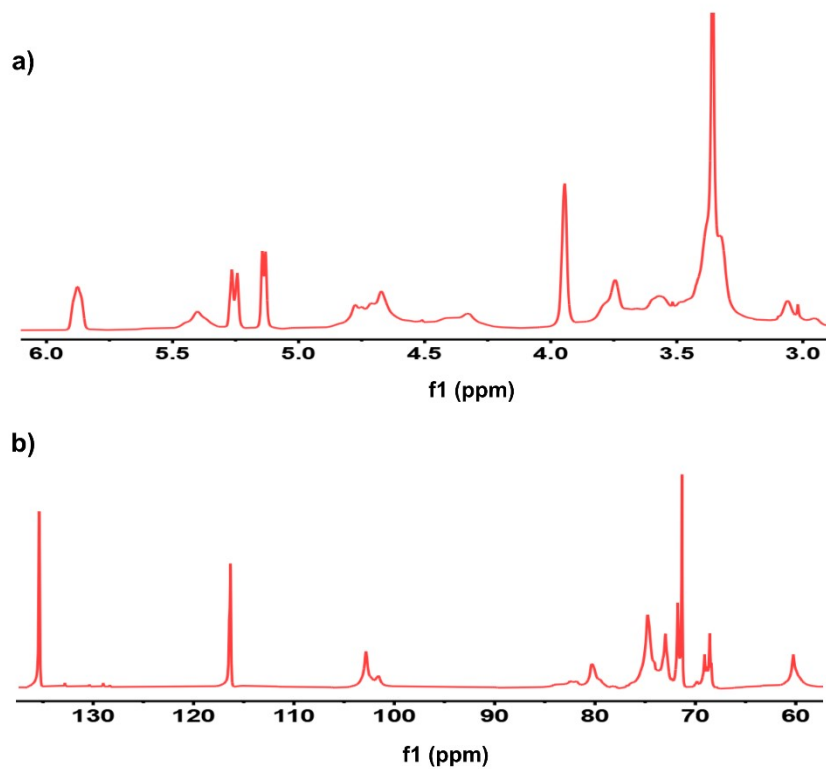

Figure 8. a)  $^1\text{H}$  NMR b)  $^{13}\text{C}$  NMR of AHP-cellulose isolated from TMAH/Triton B

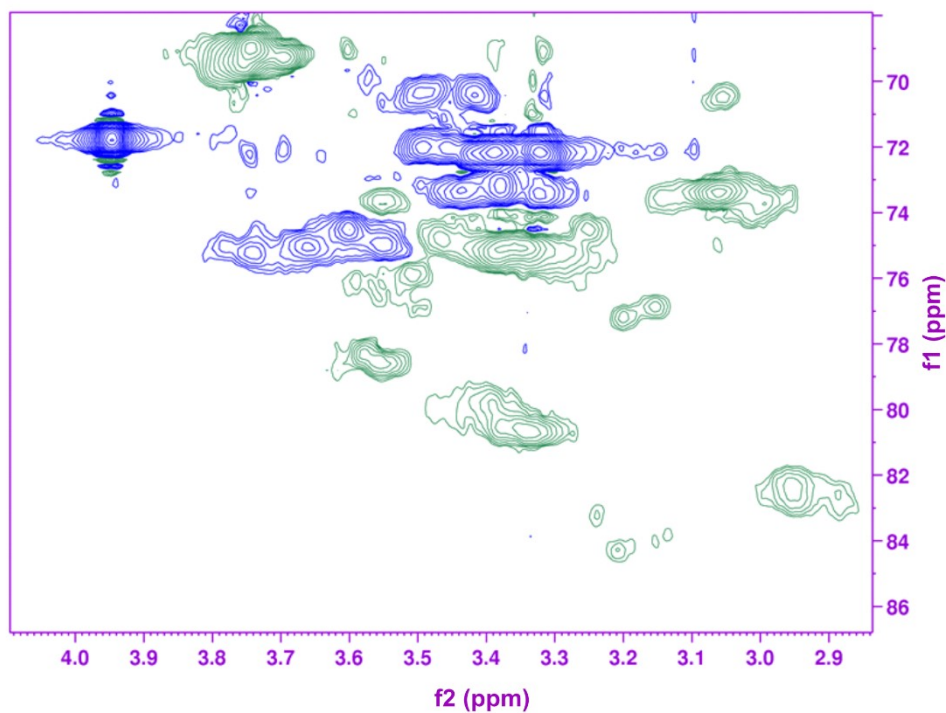

Figure 9. HSQC spectrum of AHP-cellulose isolated form TMAH

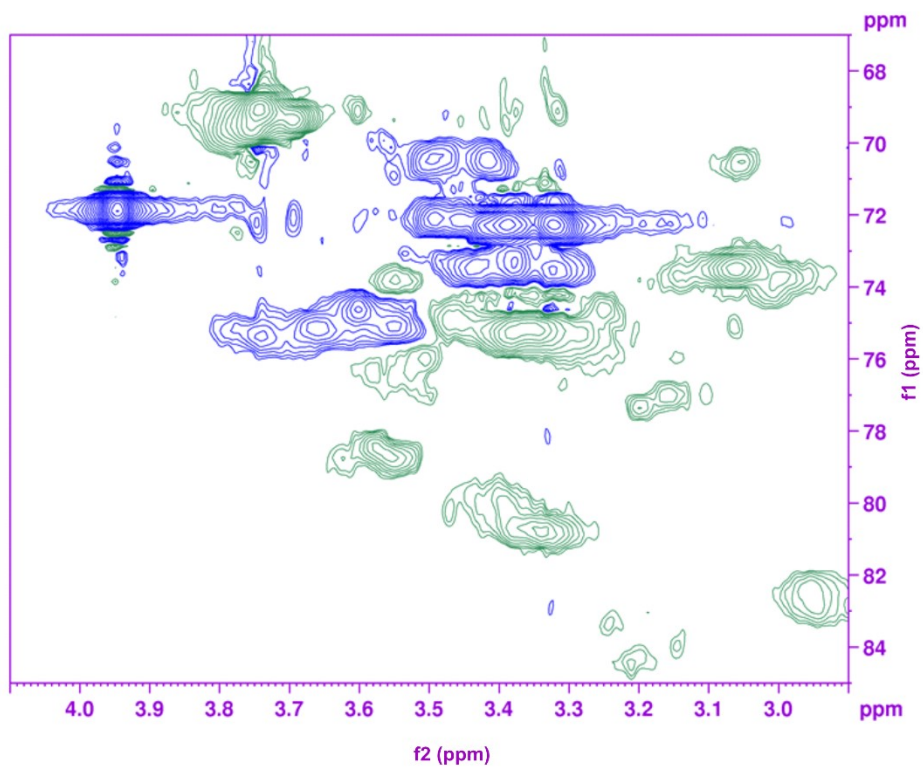

**Figure 10. HSQC spectrum of AHP-cellulose isolated from TMAH/Triton B**

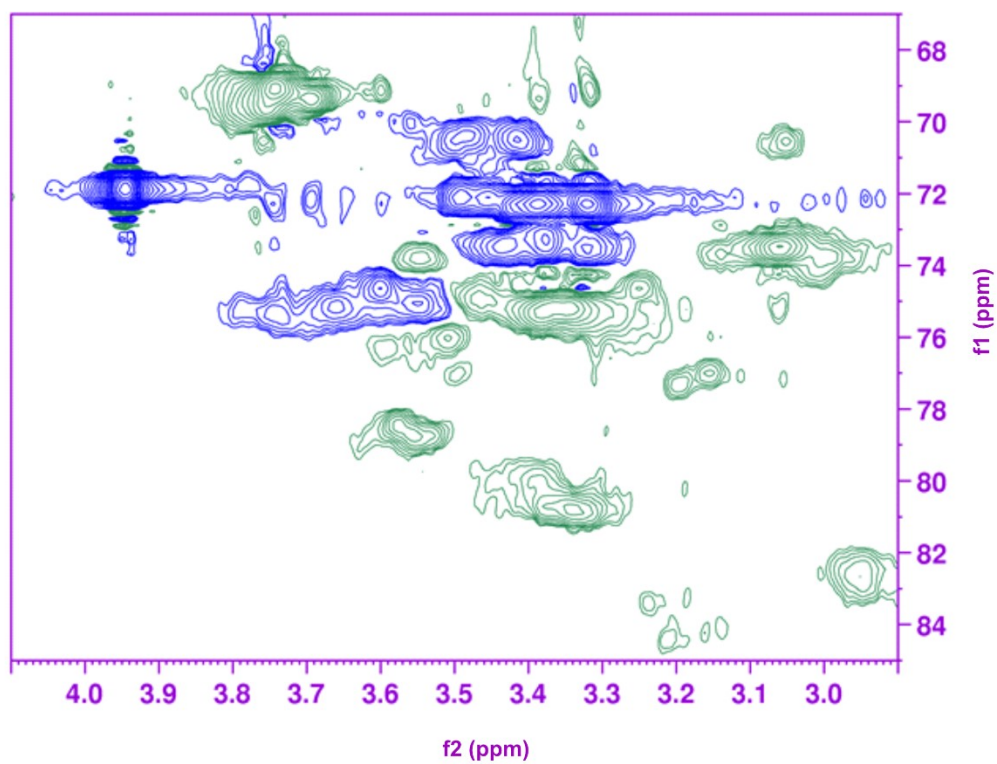

**Figure 11. HSQC spectrum of AHP-cellulose isolated from TMAH/NaOH**

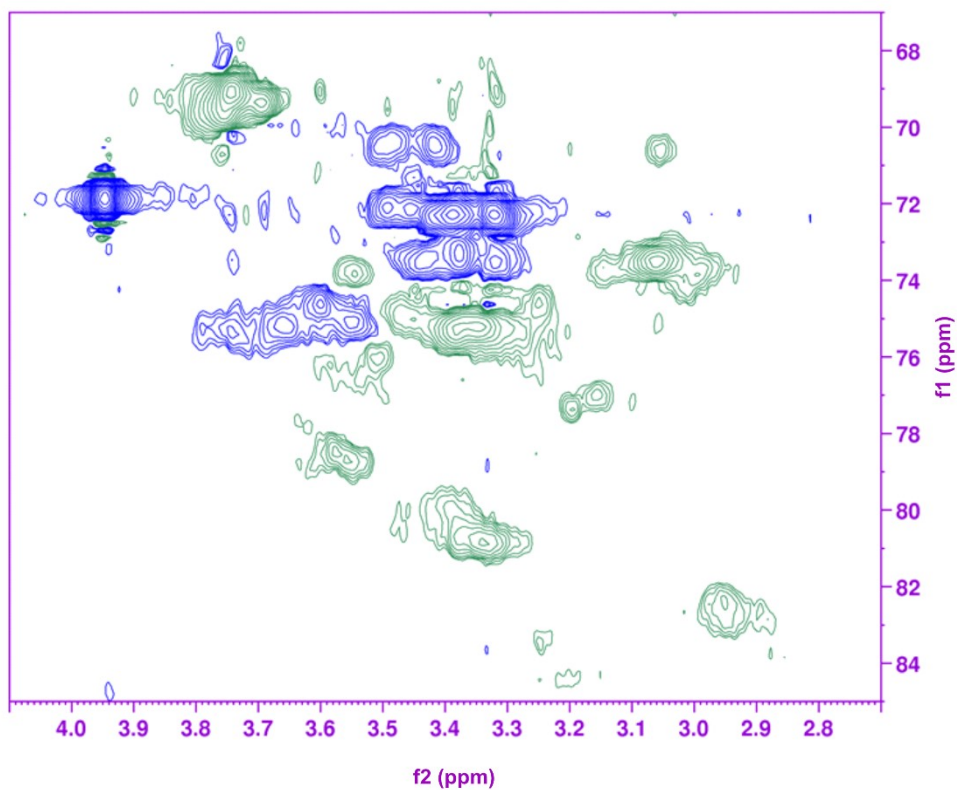

Figure 12. HSQC spectrum of AHP-cellulose isolated form Triton B/NaOH

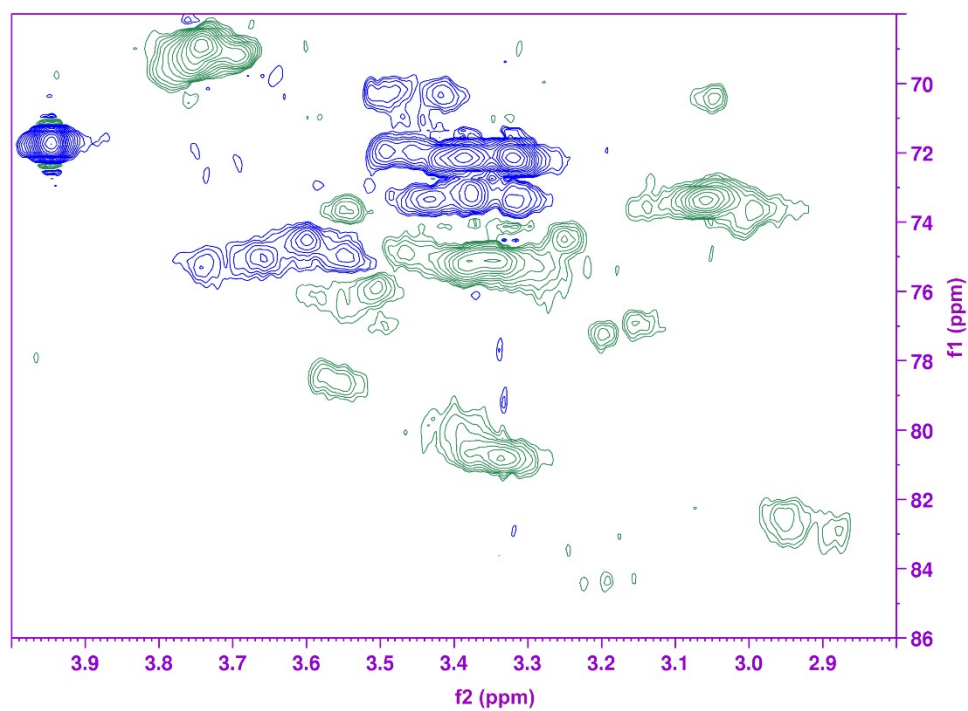

Figure 13. HSQC spectrum of AHP-cellulose isolated form NaOH

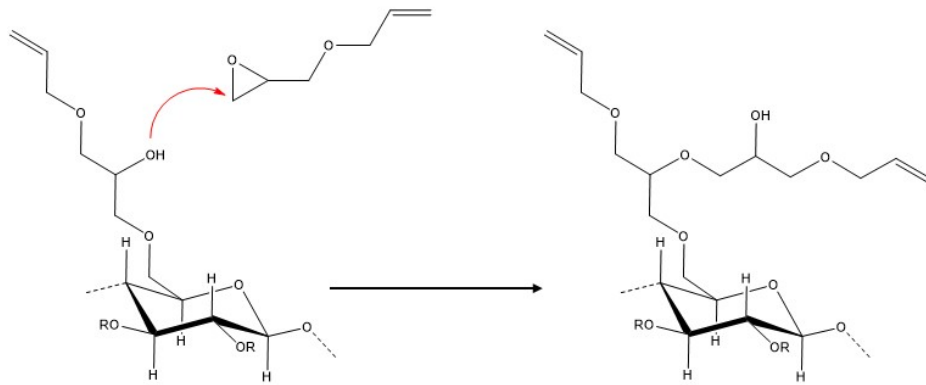

**Figure 14. Cascade reaction**
